# Supplementary material for: Stable high-efficiency monolithic all-perovskite tandem solar cells enabled by a natural reactive oxygen species scavenger
Source: Royal Society of Chemistry journal article supplement (doi:10.1039/d4ee02754j), 2024-01-01
Supplement: d4ee02754j1.pdf [file d4ee02754j1.pdf]

## Supporting Information

### **Stable High-Efficiency Monolithic All-Perovskite Tandem Solar Cells Enabled by a Natural Reactive Oxygen Species Scavenger.**

*Ruitian Sun,<sup>a</sup> Pengshuai Wang,<sup>a</sup> Lin Zhang,<sup>a</sup> Weijun Liu,<sup>b</sup> Yanjie Wen,<sup>b</sup> Fan Li,<sup>b</sup> Zhizhong Ge,<sup>a</sup> Liang Qiao,<sup>a</sup> Tao Wang,<sup>a</sup> Tianshi Ye,<sup>a</sup> Peijun Ji,<sup>a</sup> Xudong Yang<sup>\*a,b,c,d</sup>*

*<sup>a</sup>State Key Laboratory of Metal Matrix Composites, Shanghai Jiao Tong University, Shanghai 200240, China.*

*<sup>b</sup>Shenzhen Solaeon Technology Co., Ltd. Shenzhen 518000, China*

*<sup>c</sup>Center of Hydrogen Science, School of Materials Science and Engineering, Shanghai Jiao Tong University, Shanghai, 200240, China.*

*<sup>d</sup>Innovation Center for Future Materials, Zhangjiang Institute for Advanced Study, Shanghai Jiao Tong University, Shanghai, 201210, China.*

*\*Corresponding author. Email: yang.xudong@sjtu.edu.cn*

## Supplementary Note 1

Density functional theory (DFT) calculations were performed using the Vienna ab initio simulation package (VASP)<sup>[1,2]</sup> with the standard frozen-core projector augmented-wave (PAW) method<sup>[3,4]</sup>. The exchange-correlation effects were approximated by the generalized gradient approximation (GGA) utilizing the Perdew–Burke–Ernzerhof (PBE) functional.<sup>[5]</sup> The kinetic energy cut-off for the plane wave basis was set to 400 eV and a 7x7x7 Gamma-centered k-point mesh was used. The geometric structure was completely relaxed until the electron relaxation convergence criterion dropped below 10<sup>-5</sup> eV/atom and the remaining force was less than 0.02 eV/Å. Additionally, the Grimme DFT-D3 method has been considered to further describe the van der Waals interactions.<sup>[6]</sup>

The binding energies for various bulk materials (including FAPbI<sub>3</sub>, FASnI<sub>3</sub>, CNL-PbI<sub>2</sub> and CNL-SnI<sub>2</sub>) were calculated as follows. For Pb-based compounds, the binding energy  $\Delta E_{\text{FAPbI}_3}$  is defined by the equation  $\Delta E_{\text{FAPbI}_3} = E_{\text{FAPbI}_3} - E_{\text{PbI}_2} - E_{\text{FAI}}$ , where  $E_{\text{FAPbI}_3}$ ,  $E_{\text{PbI}_2}$  and  $E_{\text{FAI}}$  are calculated total energies of bulk FAPbI<sub>3</sub>, PbI<sub>2</sub> and crystalline FAI in cubic, trigonal and monoclinic symmetry, respectively.<sup>[7]</sup>  $\Delta E_{\text{CNL-PbI}_2} = E_{\text{CNL-PbI}_2} - E_{\text{PbI}_2} - E_{\text{CNL}}$ , where  $E_{\text{CNL-PbI}_2}$ ,  $E_{\text{PbI}_2}$  and  $E_{\text{CNL}}$  are calculated total energies of bulk CNL-PbI<sub>2</sub>, PbI<sub>2</sub> and gas-phase CNL. The calculations for Sn-based compounds is similarly. The visualization of electrostatic potential (ESP) and crystal structures was facilitated using

VMD<sup>[8]</sup> and VESTA software, respectively.<sup>[9]</sup>

## Supplementary Note 2

The decay curves were fitted using the bi-exponential equation:

$$Y=A_1 \exp\left(\frac{-t}{\tau_1}\right)+A_2 \exp\left(\frac{-t}{\tau_2}\right)$$

where fast ( $\tau_1$ ) and slow ( $\tau_2$ ) decay components correspond to non-radiative and radiative recombination, respectively.<sup>[10]</sup> The fitting parameters were presented in Table S3 (Supporting Information) and the average carrier lifetime was calculated using the equation:<sup>[11]</sup>

$$\tau_{average}=\frac{A_1 \tau_1^2+A_2 \tau_2^2}{A_1 \tau_1+A_2 \tau_2}$$

## Supplementary Note 3

The trap density of the perovskite film was determined using the equation:

$$N_t=\frac{2\varepsilon \varepsilon_0 V_{TFL}}{eL^2}$$

where  $N_t$  represents the trap density ( $\text{cm}^{-3}$ ),  $\varepsilon_0$  denotes the vacuum dielectric constant ( $8.85 \times 10^{-12} \text{ F m}^{-1}$ ),  $\varepsilon$  represents the relative dielectric constant of the perovskite ( $\sim 32$ ),  $e$  is the elementary electric charge ( $1.6 \times 10^{-19} \text{ C}$ ),  $L$  represents the perovskite film thickness ( $\sim 900 \text{ nm}$ ), and  $V_{TFL}$  represents the trap-filled limit voltage, which can be deduced from SCLC spectra (Figure 2i). The  $V_{TFL}$  of the control and CNL devices were 0.345 V and 0.17 V, respectively.

#### **Supplementary Note 4**

The ideality factor  $n$  is a critical parameter that provides insight into the recombination mechanisms within the solar cell. The ideality factor can be determined using the following equation:

$$\frac{d(V_{oc})}{d(\ln L)} = n \frac{k_B T}{q}$$

where  $L$  represents the light intensity,  $k_B$  represents Boltzmann constant (approximately  $1.38 \times 10^{-23}$  J/K),  $T$  is the absolute temperature (in Kelvin),  $q$  is the elementary electric charge ( $1.6 \times 10^{-19}$  C).

a

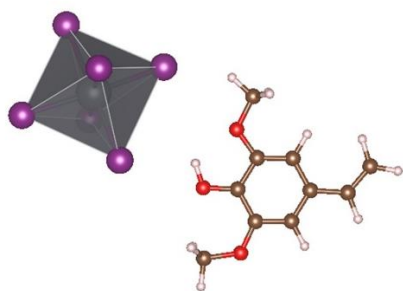

CNL-PbI<sub>2</sub>

b

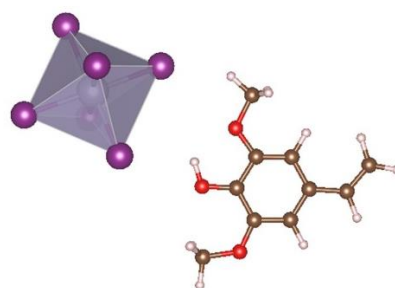

CNL-SnI<sub>2</sub>

**Figure S1.** Schematic of coordination between CNL and PbI<sub>2</sub>/SnI<sub>2</sub>.

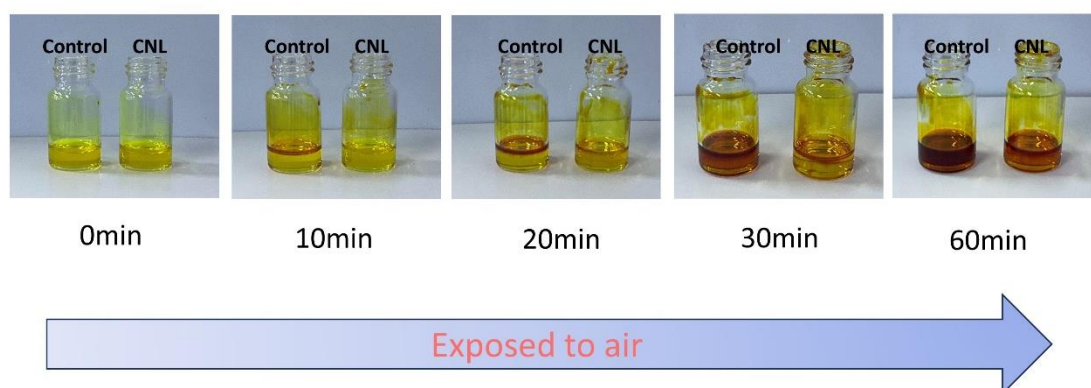

**Figure S2.** Photographs of control and CNL NBG  $(\text{FASnI}_3)_{0.6}(\text{MAPbI}_3)_{0.4}$  perovskite precursor solutions exposed to ambient air for varying durations.

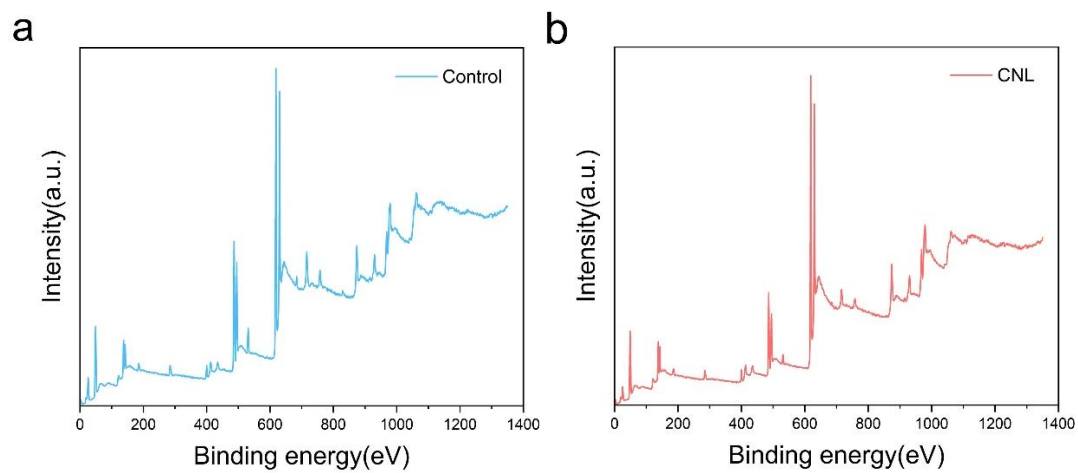

**Figure S3.** Full scan of XPS spectra of the **a**, control and **b**, CNL perovskite films.

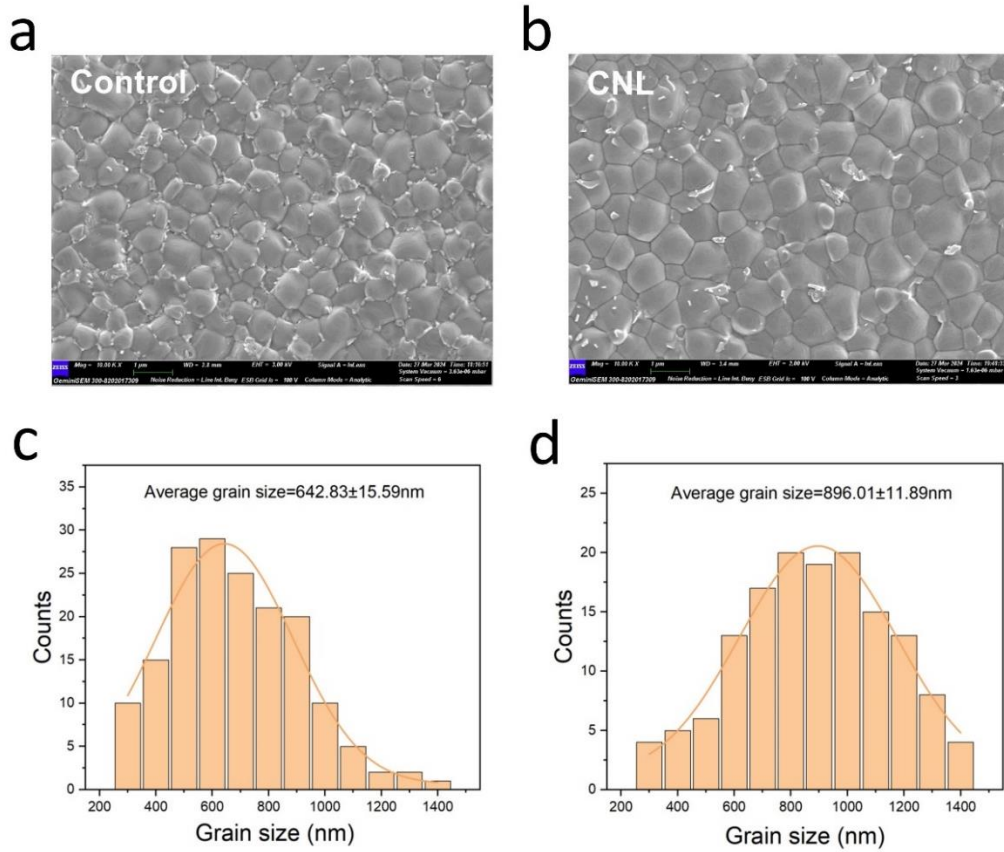

**Figure S4.** Top-view SEM images and grain size distributions of the **a**, control and **b**, CNL perovskite films.



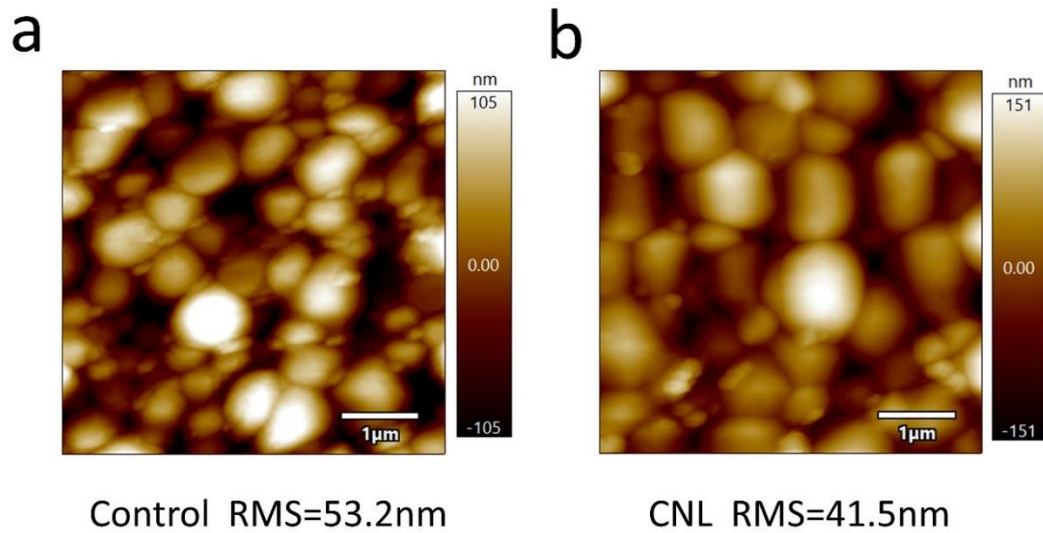

**Figure S5.** AFM images of the **a**, control and **b**, CNL perovskite films.

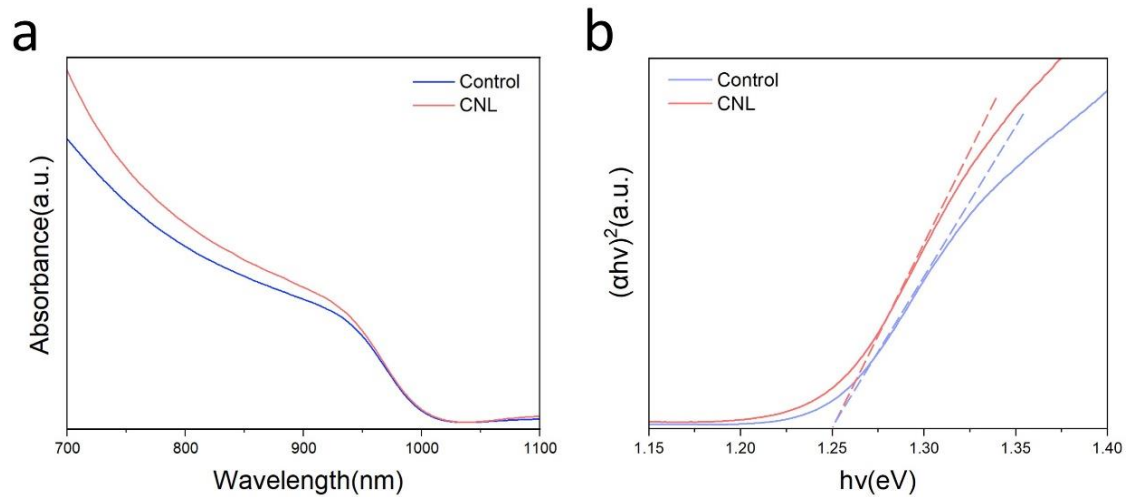

**Figure S6. a**, UV-Vis-NIR absorption spectra of the control and CNL perovskite films **b**, Tauc plots of the control and CNL perovskite films.

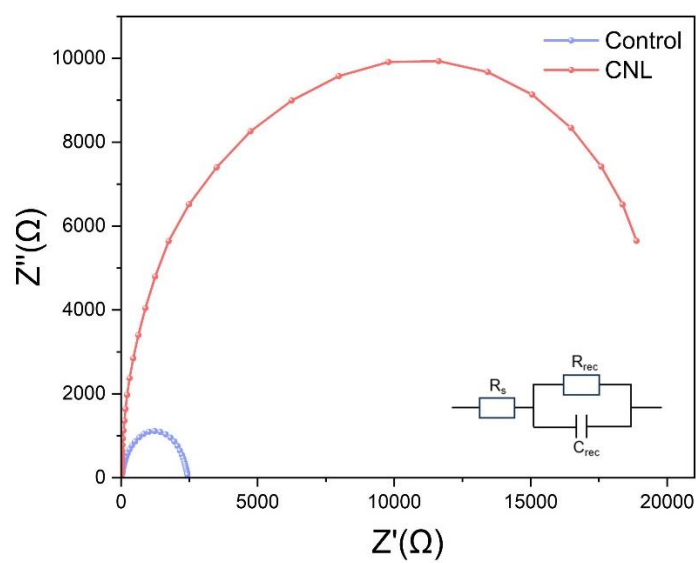

**Figure S7.** Electronic impedance spectroscopy (EIS) plots of the control and CNL NBG single junction PSCs. The inset shows the equivalent circuit diagram of EIS measurements.

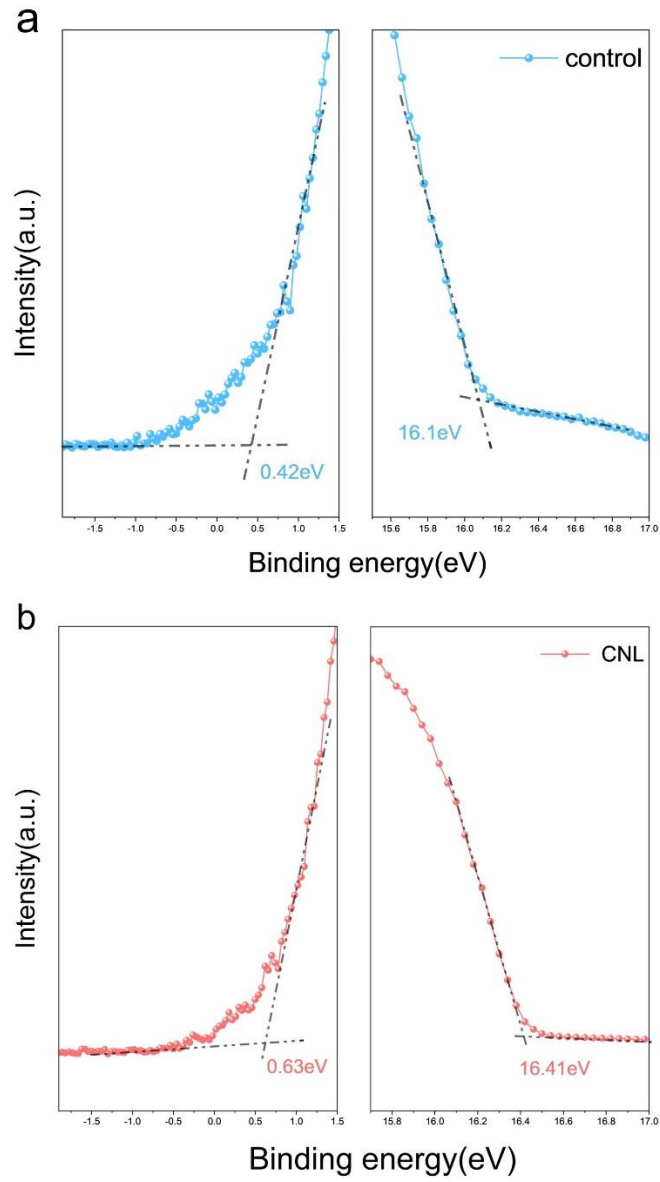

**Figure S8.** UPS spectra of the **a**, control and **b**, CNL perovskite films.

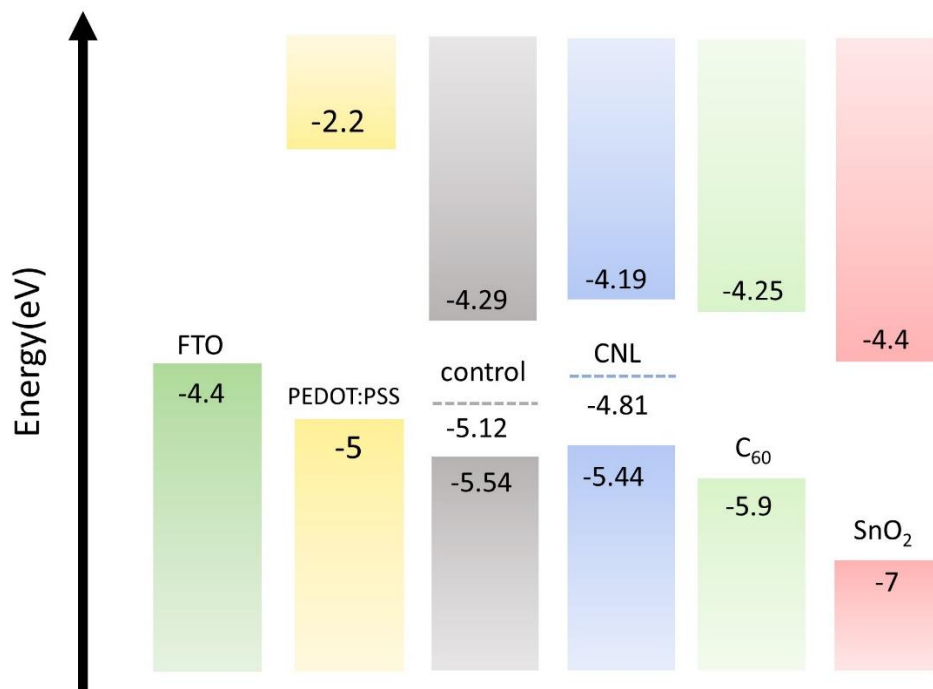

**Figure S9.** Energy level diagram of the devices based on mixed Sn-Pb perovskites.

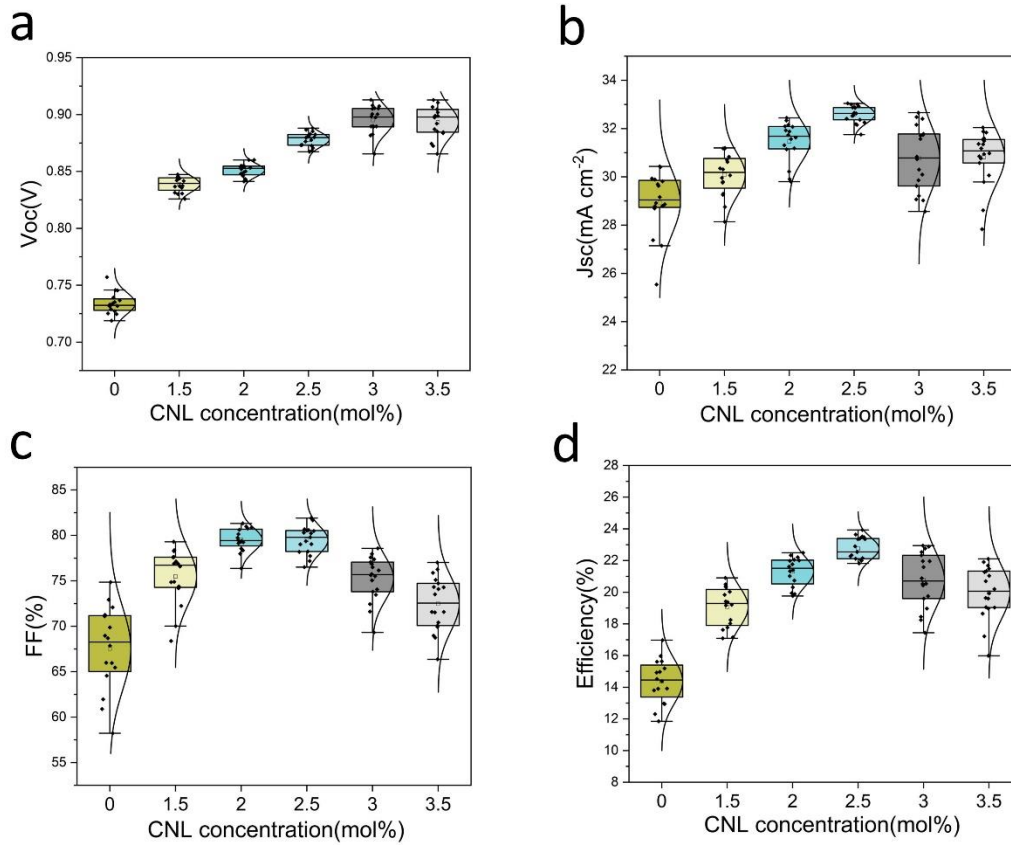

**Figure S10.** Statistics of J-V parameters for single junction NBG PSCs without or with different concentrations of CNL (1.5, 2, 2.5, 3 and 3.5 mol%, relative to MAI+FAI in perovskite) **a**,  $V_{oc}$ ; **b**,  $J_{sc}$ ; **c**, FF; **d**, Efficiency.

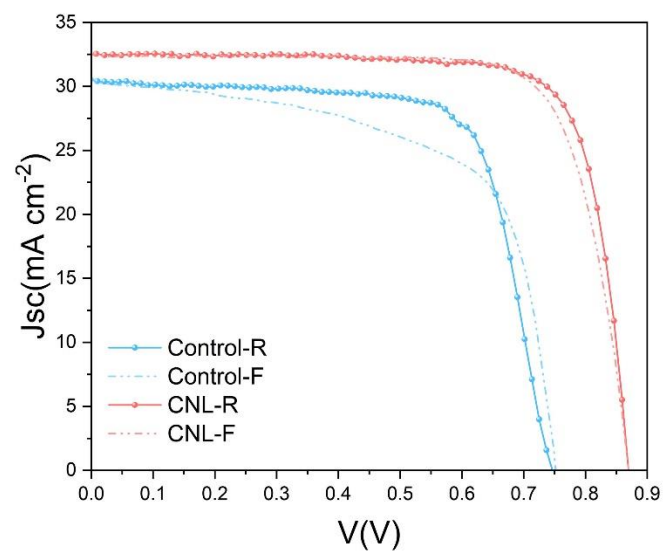

**Figure S11.** J-V curves of the champion control and CNL single junction NBG perovskite solar cells under reverse (R) and forward (F) voltage scan (aperture area of  $1.035 \text{ cm}^2$ ).

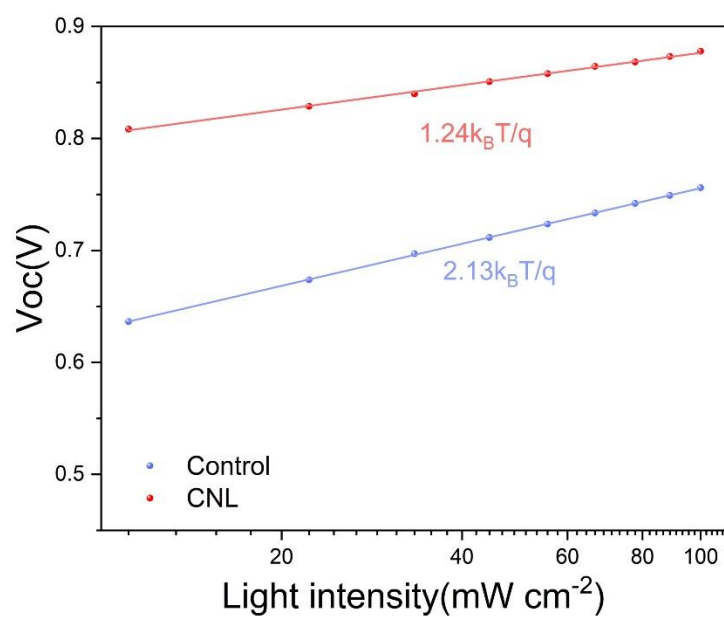

**Figure S12.** Fitting curves of light intensity-dependent  $V_{oc}$  measurements for control and CNL single junction NBG perovskite solar cells.



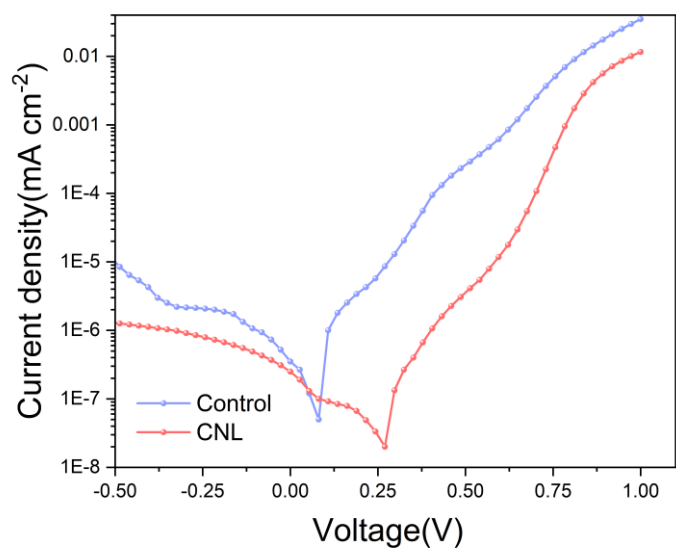

**Figure S13.** Dark J-V curves of the control and CNL single junction NBG perovskite solar cells.

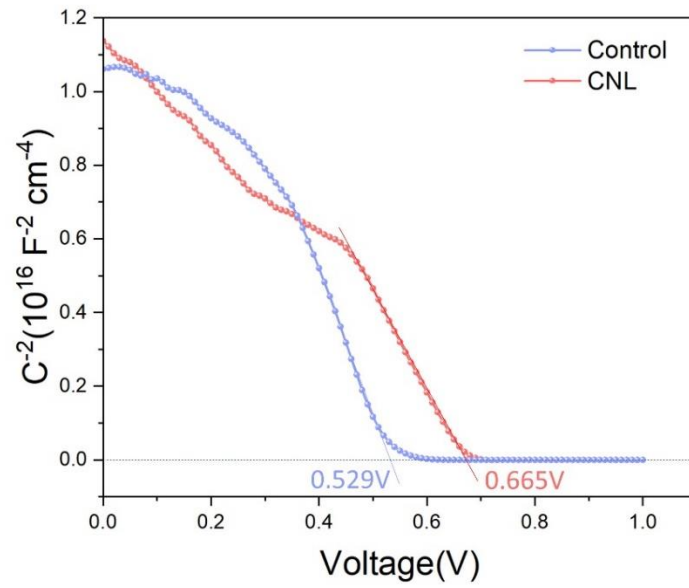

**Figure S14.** Curves of Mott-Schottky (M-S) measurements of the control and CNL single junction NBG perovskite solar cells.

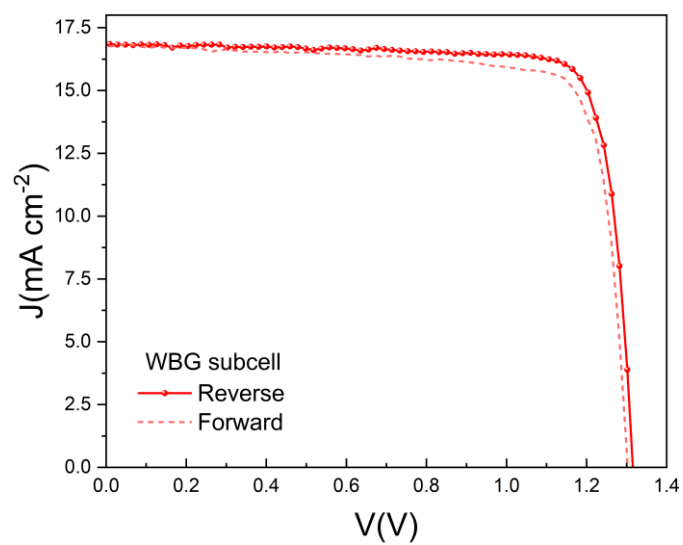

**Figure S15.** J-V curves of the champion single junction WBG perovskite solar cell under reverse (R) and forward (F) voltage scan (aperture area of 0.077 cm<sup>2</sup>).

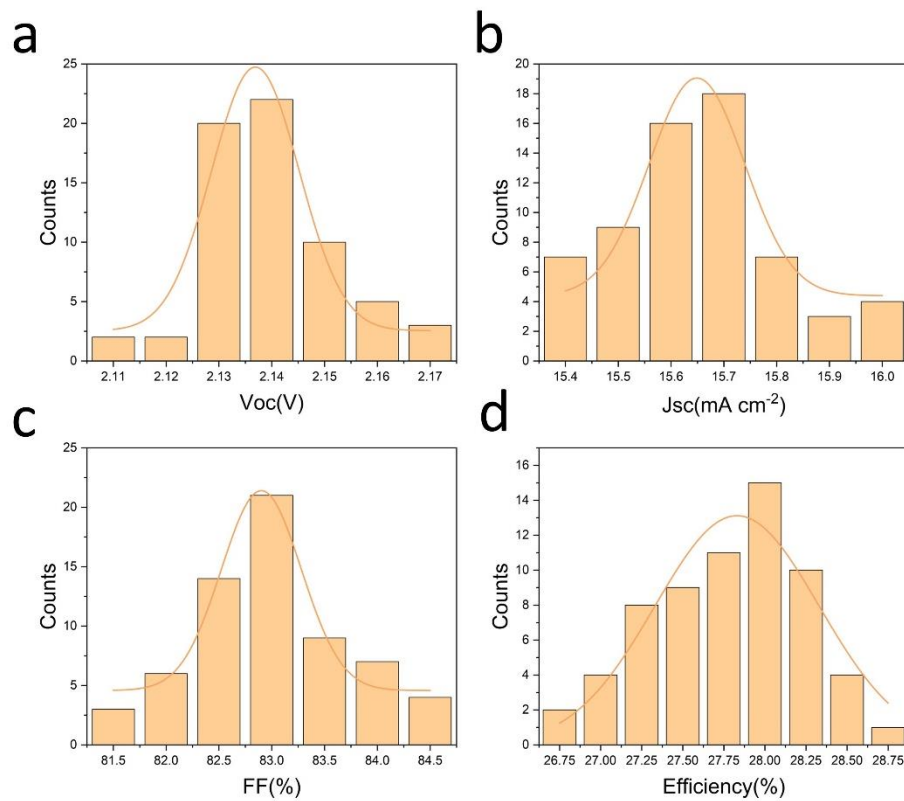

**Figure S16.** Photovoltaic performance distributions of 64 monolithic all-perovskite tandem solar cells **a**,  $V_{oc}$ ; **b**,  $J_{sc}$ ; **c**, FF; **d**, Efficiency.

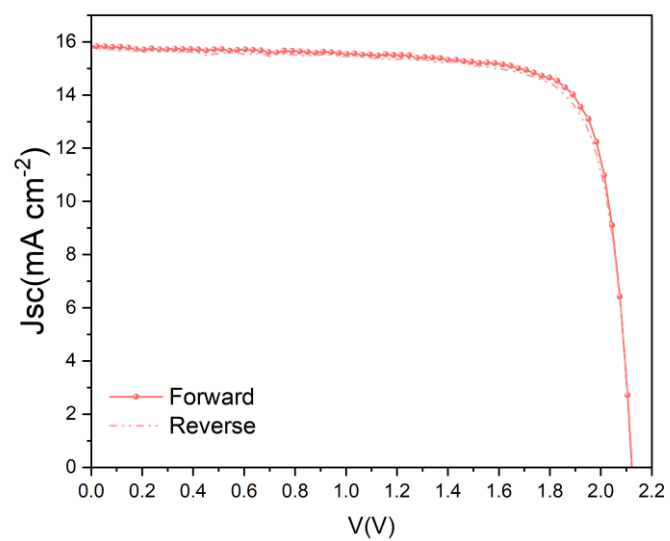

**Figure S17.** J-V curves of the champion monolithic all-perovskite tandem solar cells under reverse (R) and forward (F) voltage scan (aperture area of 1.035 cm<sup>2</sup>).

### 1. Testing Method (Code and Name) for This Test

IEC 60904-1: 2020 Photovoltaic devices- Part 1: Measurement of photovoltaic current-voltage characteristics.

### 2. Measurement Standards Used in This Test

| Measurement Standards Used in This Test |                   |                                                   |                                                                                                                                                    |                                                             |            |
|-----------------------------------------|-------------------|---------------------------------------------------|----------------------------------------------------------------------------------------------------------------------------------------------------|-------------------------------------------------------------|------------|
| Name                                    | Number            | Measuring Range                                   | Uncertainty or Accuracy Class or Maximum Permissible Error                                                                                         | Name of Traceability Institution/Certificate No.            | Due Date   |
| SourceMeter                             | 10807C0087<br>8-2 | DCI:<br>(-10 $\mu$ A-1A);<br>DCV:<br>(20mV~20V)   | Measure: DCV: $U_{rel}=0.05\%,k=2$ ; DCI:<br>$U_{rel}=0.05\%,k=2$<br>Output: DCV: $U_{rel}=0.05\%,k=2$ ; DCI:<br>$U_{rel}=0.05\%,k=2$              | Fujian Metrology Institute/<br>23D2-02429                   | 2024-04-16 |
| Solar Simulator                         | 2014-017          | (300~1200)<br>nm; (800~<br>1200) W/m <sup>2</sup> | Spectral Match: (300~360)<br>nm: $U_{rel}=8.0\% (k=2)$ ;(360~<br>1200) nm: $U_{rel}=6.2\%$<br>( $k=2$ );Irradiance Ratio:<br>$U_{rel}=1.2\% (k=2)$ | Fujian Metrology Institute/<br>23Q2-00526                   | 2024-06-13 |
| WPVS<br>Reference Solar<br>Cell         | 015-2014          | (300~1200)<br>nm                                  | $U=1.3\% (k=2)$                                                                                                                                    | National Institute of<br>Metrology,<br>China/GXgf2023-01245 | 2025-03-29 |
| Digital<br>Thermometer                  | 15-B              | (15~65) $^{\circ}$ C                              | $U=0.1\% (k=2)$                                                                                                                                    | Fujian Metrology<br>Institute/23B2-07940                    | 2024-06-18 |

### 3. Test Location

Room 108, Building 4, MinHou Scientific Research Base

### 4. Environmental Condition

Temperature: 25.5 $^{\circ}$ C; Relative Humidity: 37%

### 5. Standard Test Condition (STC):

Total Irradiance: 1000 W/m<sup>2</sup>

Temperature for DUT: 25.0 °C

Spectral Distribution: AM1.5G

### 6. Measurement Data under STC

| Scan Direction | $I_{sc}$ (mA) | $V_{oc}$ (V) | $I_{MPP}$ (mA) | $V_{MPP}$ (V) | $P_{MPP}$ (mW) | FF (%) | $\eta$ (%) | Area (cm <sup>2</sup> ) |
|----------------|---------------|--------------|----------------|---------------|----------------|--------|------------|-------------------------|
| Forward        | 1.222         | 2.138        | 1.140          | 1.863         | 2.124          | 81.30  | 27.60      |                         |
| Reverse        | 1.223         | 2.136        | 1.158          | 1.893         | 2.192          | 83.91  | 28.48      |                         |

### 7. I-V & P-V Characteristic Curves under STC

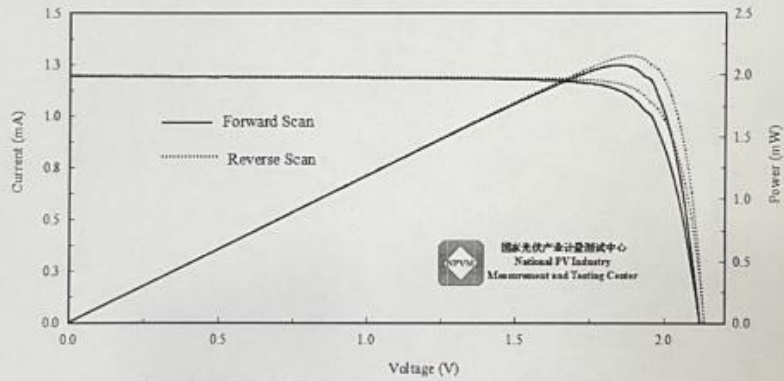

Figure 1. I-V and P-V characteristic curves of cell under STC

### 8. Pictures of the Measured Sample

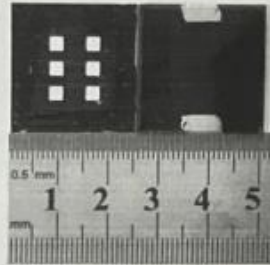

Figure 2. Obverse side of the sample and mask used during test

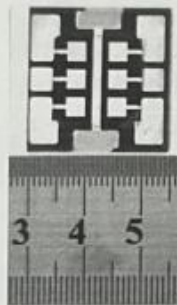

Figure 3. Reverse side of the measured sample

Test by: 陈彩云 (Chen Caiyun)

Checked by: 何翔 (He Xiang)

Approved by: 李健生 (Li Jiansheng)

Date: 2024.03.15

**Figure S18.** Certification report for an encapsulated all-perovskite tandem solar cell based on a CNL NBG subcell by Chinese National PV Industry Measurement and Testing Center (NPVM).



## Supplemental Tables

**Table S1.** Summary of the efficiency and operation stability of the recent reported NBG PSCs and all-perovskite TSCs

| PCE-NBG(%) | PCE-TSC(%) | MPPT-TSC  | Ref                                                                  |
|------------|------------|-----------|----------------------------------------------------------------------|
| 20.74      | 25.6       | T88-500h  | Tan et al. <i>Nat. Energy</i> , <b>2020</b> , 5, 870-880.            |
| 22.2       | 26.7       | T90-600h  | Tan et al. <i>Nature</i> , <b>2022</b> , 603, 73-78.                 |
| 22.2       | 25.5       | T80-1500h | Zhu et al. <i>Nat. Energy</i> , <b>2022</b> , 7, 642-651.            |
| 21.51      | 25.05      | T90-450h  | Li et al. <i>Nat. Energy</i> , <b>2022</b> , 7, 744-753.             |
| 21.5       | 26.29      | T86-500h  | Sargent et al. <i>Nature</i> , <b>2023</b> , 613, 676-681.           |
| 23.24      | 26.3       | T80-301h  | Zhao et al. <i>Nat. Energy</i> , <b>2023</b> , 8, 714-724.           |
| 23.8       | 28         | T90-600h  | Tan et al. <i>Nature</i> , <b>2023</b> , 620, 994-1000.              |
| 21.72      | 27.34      | /         | Ke et al. <i>Nature</i> , <b>2023</b> , 624,69-73.                   |
| 22.58      | 26.33      | T88-1000h | Wang et al. <i>Energy Environ. Sci.</i> <b>2024</b> , 17, 2512-2520. |
| 21.65      | 26.96      | T80-370h  | Ning et al. <i>Nat. Energy</i> , <b>2024</b> , 9, 298-307.           |
| 23.11      | 27.35      | /         | Ke et al. <i>Nat. Commun.</i> <b>2024</b> , 15, 2324.                |
| 21.88      | 27.81      | T80-292h  | Zhao et al. <i>Sci. Adv.</i> <b>2024</b> , 10, 16                    |
| 22.7       | 27.8       | T90>1000h | Yan et al. <i>Joule</i> , <b>2024</b>                                |
| 23.7       | 28.48      | T90-750h  | This work.                                                           |

**Table S2.** Photovoltaic parameters of the champion WBG subcell, NBG subcell and tandem solar cell (aperture area of 0.077 cm<sup>2</sup>).

|                     | Scan<br>Direction | J <sub>sc</sub><br>(mA cm <sup>-2</sup> ) | V <sub>oc</sub><br>(V) | FF<br>(%) | PCE<br>(%) |
|---------------------|-------------------|-------------------------------------------|------------------------|-----------|------------|
| NBG<br>(control)    | Reverse           | 30.42                                     | 0.757                  | 74.8      | 17.22      |
|                     | Forward           | 30.4                                      | 0.751                  | 68.64     | 15.67      |
| NBG<br>(CNL)        | Reverse           | 32.85                                     | 0.883                  | 81.7      | 23.7       |
|                     | Forward           | 32.86                                     | 0.888                  | 80.08     | 23.38      |
| WBG                 | Reverse           | 16.9                                      | 1.314                  | 83.15     | 18.46      |
|                     | Forward           | 16.79                                     | 1.301                  | 80.81     | 17.65      |
| Tandem<br>(control) | Reverse           | 14.32                                     | 1.996                  | 78.83     | 22.55      |
|                     | Forward           | 14.33                                     | 1.999                  | 74.13     | 21.23      |
| Tandem<br>(CNL)     | Reverse           | 15.77                                     | 2.153                  | 84.58     | 28.71      |
|                     | Forward           | 15.77                                     | 2.156                  | 83.1      | 28.25      |
|                     | Stabilized        | —                                         | —                      | —         | 28.56      |

**Table S3.** Photovoltaic parameters of the champion NBG and tandem perovskite solar cell (aperture area of 1.035 cm<sup>2</sup>).

|                  | Scan<br>Direction | Jsc<br>(mA cm <sup>-2</sup> ) | Voc<br>(V) | FF<br>(%) | PCE<br>(%) |
|------------------|-------------------|-------------------------------|------------|-----------|------------|
| NBG<br>(control) | Reverse           | 30.4                          | 0.752      | 71.3      | 16.30      |
|                  | Forward           | 30.38                         | 0.752      | 63.63     | 14.54      |
| NBG<br>(CNL)     | Reverse           | 32.5                          | 0.869      | 78.18     | 22.08      |
|                  | Forward           | 32.37                         | 0.869      | 76.31     | 21.47      |
| Tandem           | Reverse           | 15.8                          | 2.12       | 81.21     | 27.2       |
|                  | Forward           | 15.76                         | 2.121      | 79.51     | 26.57      |

**Table S4.** PL decay lifetimes of control and CNL perovskite films.  $\tau_1$  and  $\tau_2$  correspond to the fast and slow decay components, respectively.

|         | $\tau_1(\text{ns})$ | $A_1$ | $\tau_2(\text{ns})$ | $A_2$ | $\tau_{\text{average}}(\text{ns})$ |
|---------|---------------------|-------|---------------------|-------|------------------------------------|
| Control | 8.547               | 0.823 | 153.8               | 0.53  | 123.91                             |
| CNL     | 6.538               | 0.53  | 417.52              | 0.434 | 409.81                             |

## REFERENCES

- [1] G. Kresse, J. Hafner, *Phys. Rev. B*, 1993, **47**, 558.
- [2] G. Kresse, J. Furthmuller, *Phys. Rev. B*, 1996, **54**, 11169.
- [3] P. E. Blöchl, *Phys. Rev. B*, 1994, **50**, 17953.
- [4] G. Kresse, D. Joubert. *Phys. Rev. B*, 1999, **59**, 1758.
- [5] J. P. Perdew, K. Burke, M. Ernzerhof, *Phys. Rev. Lett.*, 1996, **77**, 3865.
- [6] S. Grimme, J. Antony, S. Ehrlich, H. Krieg, *J. Chem. Phys.*, 2010, **132**, 154104.
- [7] A. A. Petrov, E. A. Goodilin, A. B. Tarasov, V. A. Lazarenko, P. V. Dorovatovskii, V. N. Khrustalev, *Acta Cryst.*, 2017, **73**, 569-572.
- [8] W. Humphrey, A. Dalke, K. Schulten, *J. Molec. Graphics*, 1996, **14**, 33.
- [9] K. Momma, F. Izumi, *J. Appl. Cryst.*, 2011, **44**, 1272-1276.
- [10] M. Jeong, I. W. Choi, E. M. Go, Y. Cho, M. Kim, B. Lee, S. Jeong, Y. Jo, H. W. Choi, J. Lee, J. H. Bae, S. K. Kwak, D. S. Kim, C. Yang, *Science*, 2020, **369**, 1615-1620.
- [11] J. Zhou, S. Fu, S. Zhou, L. Huang, C. Wang, H. Guan, D. Pu, H. Cui, C. Wang, T. Wang, W. Meng, G. Fang, W. Ke, *Nat. Commun.*, 2024, **15**, 2324.
